# Supplementary material for: Fluorescent Single-Core and Multi-Core Nanoprobes as Cell Trackers and Magnetic Nanoheaters
Source: MDPI journal article supplement (doi:10.3390/magnetochemistry8080083), 2022-07-29
Supplement: s1 [file s1]

## Supporting Information of

# Fluorescent Single-core and Multi-core Nanoprobes as Cell Trackers and Magnetic Nanoheaters

Pelayo García Acevedo<sup>1,\*†</sup>, Manuel A. González Gómez<sup>1,\*†</sup>, Ángela Arnosa Prieto<sup>1</sup>, Lisandra de Castro Alves<sup>1</sup>, Román Seco Gudiña<sup>1</sup>, Yolanda Piñeiro<sup>1</sup> and José Rivas<sup>1</sup>

<sup>1</sup> NANOMAG Laboratory, Applied Physics Department and iMATUS Materials Institute, Universidade de Santiago de Compostela, 15782 Santiago de Compostela, Spain; angela.arnosa@usc.es (Á.A.P.); lisandracristina.decastro@usc.es (L.C.A.); roman.seco@rai.usc.es (R.S.G.); y.pineiro.redondo@usc.es (Y.P.); jose.rivas@usc.es (J.R.)

\* Correspondence: pelayo.garcia.acevedo@usc.es (P.G.A.); manuelantonio.gonzalez@usc.es (M.A.G.G.)  
Tel.: +34-881813097 (P.G.A. and M.A.G.G.)

† The authors contributed equally to this work.

Figure S1 shows the diffractograms of magnetite cores NPs synthesized by co-precipitation method ( $\text{Fe}_3\text{O}_4@PEG$  and  $\text{Fe}_3\text{O}_4@OA$ ) and the thermal decomposition method ( $\text{Fe}_3\text{O}_4@OA$ ). All the diffraction peaks match the nine diffraction peaks at (1 1 1), (2 2 0), (3 1 1), (4 0 0), (4 2 2), (5 1 1), (4 4 0), (6 2 0) and (5 5 3) by comparison with Inorganic Crystal Structure Database (ICSD card No. 98-015-8742), which correspond with an inverse spinel structure crystalline phase of magnetite. [1]

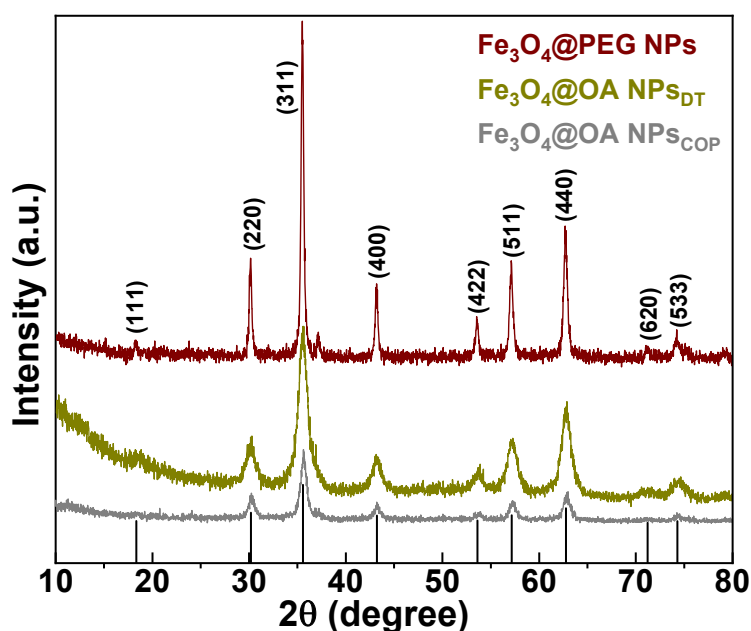

**Figure S1.** XRD patterns of  $\text{Fe}_3\text{O}_4@PEG$  NPs (wine pattern),  $\text{Fe}_3\text{O}_4@OA$  NPs, synthesized by decomposition method, DT (dark yellow pattern) and  $\text{Fe}_3\text{O}_4@OA$  NPs, synthesized by co-precipitation method, COP (grey pattern), compared to the XRD pattern of magnetite from the ICDS card No. 98-015-8742 data base.

In figure S2, the FTIR spectra of coated MNPs synthesized by co-precipitation method ( $\text{Fe}_3\text{O}_4@\text{PEG}$  and  $\text{Fe}_3\text{O}_4@\text{OA}$ ) and the thermal decomposition method ( $\text{Fe}_3\text{O}_4@\text{OA}$ ) are shown. As it can be seen, all samples show similar absorption bands between  $530\text{--}550\text{ cm}^{-1}$ , associated with the stretching vibration of the tetrahedral groups ( $\text{Fe}^{3+}\text{--O}^{2-}$ ) for  $\text{Fe}_3\text{O}_4$ . [2] For both OA coated  $\text{Fe}_3\text{O}_4$  NPs, two absorption peaks can be observed at  $2925$  and  $2848\text{ cm}^{-1}$ , that can be attributed to the asymmetric and symmetric  $\text{CH}_2$  stretching of the oleic acid, respectively. [3,4] Besides, two peaks appear around  $1598$  and  $1521\text{ cm}^{-1}$  which correspond to the asymmetric and symmetric stretching vibrations of  $\text{COO}^-$  groups of this stabilizing agent[4]. In addition, the  $\text{CH}_2$  bending mode of aliphatic chains appears around  $1406\text{ cm}^{-1}$ [4]. In addition, PEG coated  $\text{Fe}_3\text{O}_4$  NPs show a broad band around  $3400\text{ cm}^{-1}$  associated to the presence  $\text{--OH}$  groups adsorbed on the nanoparticle surface. The absorptions bands at  $2860$  and  $1469\text{ cm}^{-1}$  are correlated to the stretching modes of  $\text{CH}_2$  and  $\text{C=C}$  groups, respectively, in the polymer. [5]

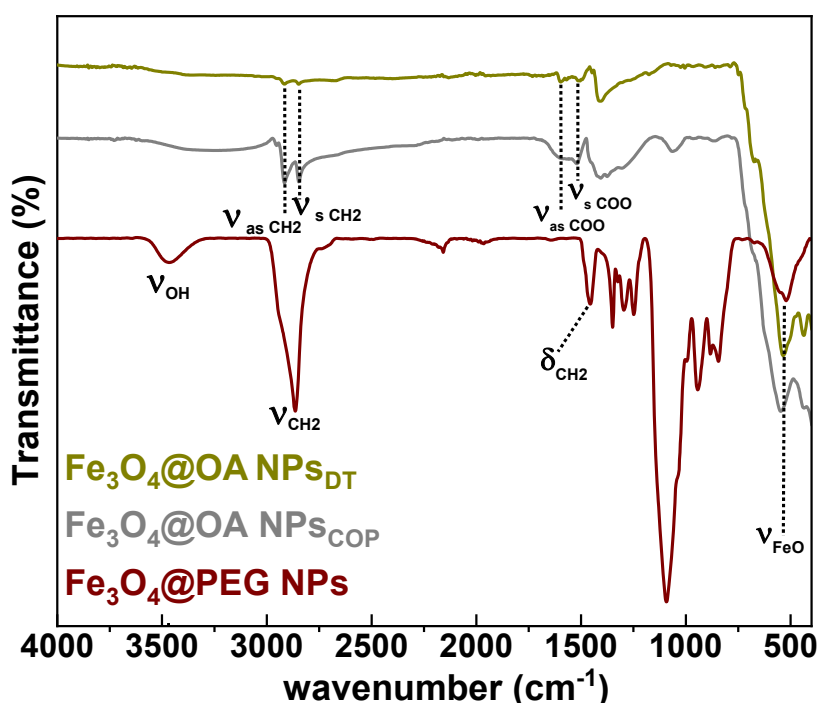

**Figure S2.** XRD patterns of  $\text{Fe}_3\text{O}_4@\text{PEG}$  NPs (wine pattern),  $\text{Fe}_3\text{O}_4@\text{OA}$  NPs, synthesized by decomposition method, DT (dark yellow pattern) and  $\text{Fe}_3\text{O}_4@\text{OA}$  NPs, synthesized by co-precipitation method, COP (grey pattern), compared to the XRD pattern of magnetite from the ICDS card No. 98-015-8742 data base.

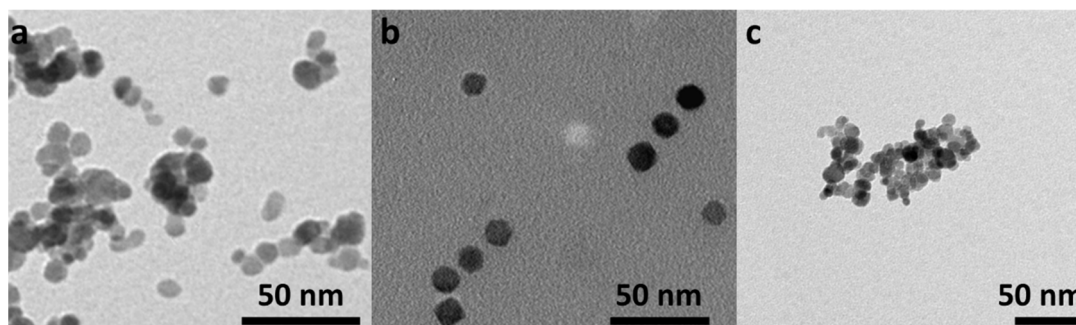

**Figure S3.** Representative TEM micrographs of  $\text{Fe}_3\text{O}_4@\text{OA}$  NPs, synthesized by co-precipitation method,  $\text{Fe}_3\text{O}_4@\text{OA}$  NPs, synthesized by decomposition method and  $\text{Fe}_3\text{O}_4@\text{PEG}$  NPs.

1. Coker, V.S.; Bell, A.M.T.; Pearce, C.I.; Patrick, R.A.D.; van der Laan, G.; Lloyd, J.R. Time-Resolved Synchrotron Powder X-Ray Diffraction Study of Magnetite Formation by the Fe(III)-Reducing Bacterium *Geobacter Sulfurreducens*. *American Mineralogist* **2008**, *93*, 540–547, doi:10.2138/am.2008.2467.
2. Rajan, A.; Sharma, M.; Sahu, N.K. Assessing Magnetic and Inductive Thermal Properties of Various Surfactants Functionalised Fe<sub>3</sub>O<sub>4</sub> Nanoparticles for Hyperthermia. *Scientific Reports* **2020**, *10*, doi:10.1038/s41598-020-71703-6.
3. Wei, Y.; Han, B.; Hu, X.; Lin, Y.; Wang, X.; Deng, X. Synthesis of Fe<sub>3</sub>O<sub>4</sub> Nanoparticles and Their Magnetic Properties. In Proceedings of the Procedia Engineering; Elsevier Ltd, 2012; Vol. 27, pp. 632–637.
4. Yang, K.; Peng, H.; Wen, Y.; Li, N. Re-Examination of Characteristic FTIR Spectrum of Secondary Layer in Bilayer Oleic Acid-Coated Fe<sub>3</sub>O<sub>4</sub> Nanoparticles. *Applied Surface Science* **2010**, *256*, 3093–3097, doi:10.1016/j.apsusc.2009.11.079.
5. Gopal, S.V.; Chitrambalam, S.; Joe, I.H. Coherent Source Interaction, Third-Order Nonlinear Response of Synthesized PEG Coated Magnetite Nanoparticles in Polyethylene Glycol and Its Application. *Optics and Laser Technology* **2018**, *98*, 84–91, doi:10.1016/j.optlastec.2017.07.047.
